# Supplementary material for: Cross-sectional survey: risk-averse French GPs use more rapid-antigen diagnostic tests in tonsillitis in children
Source: PubMed Central journal article supplement — BMJ Open. 2013 Oct 25;3(10):e003540. doi: 10.1136/bmjopen-2013-003540 (PMC3808757; doi:10.1136/bmjopen-2013-003540), 2013-10-25
Supplement: bmjopen-2013-003540.draft_revisions.pdf [file bmjopen-2013-003540.draft_revisions.pdf]

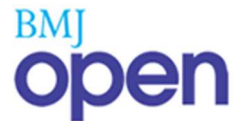

**Cross-sectional survey : Risk-averse French GPs use more rapid-antigen diagnostic tests in tonsillitis**

|                                 |                                                                                                                                                                                                                                                                                                                                                                                                                                                                                                                                                                                                                                                                                                                                                                           |
|---------------------------------|---------------------------------------------------------------------------------------------------------------------------------------------------------------------------------------------------------------------------------------------------------------------------------------------------------------------------------------------------------------------------------------------------------------------------------------------------------------------------------------------------------------------------------------------------------------------------------------------------------------------------------------------------------------------------------------------------------------------------------------------------------------------------|
| Journal:                        | <i>BMJ Open</i>                                                                                                                                                                                                                                                                                                                                                                                                                                                                                                                                                                                                                                                                                                                                                           |
| Manuscript ID:                  | bmjopen-2013-003540                                                                                                                                                                                                                                                                                                                                                                                                                                                                                                                                                                                                                                                                                                                                                       |
| Article Type:                   | Research                                                                                                                                                                                                                                                                                                                                                                                                                                                                                                                                                                                                                                                                                                                                                                  |
| Date Submitted by the Author:   | 03-Jul-2013                                                                                                                                                                                                                                                                                                                                                                                                                                                                                                                                                                                                                                                                                                                                                               |
| Complete List of Authors:       | Michel-Lepage, Audrey; Aix Marseille Université , Aix Marseille School of Economics - SESSTIM UMR 912, Inserm IRD; IHU, Fondation Méditerranée Infection<br>Ventelou, Bruno; Aix Marseille Université , Aix Marseille School of Economics - SESSTIM UMR 912, Inserm IRD; CNRS, U6579 (greqam)<br>Nebout, Antoine; Aix Marseille Université , Aix Marseille School of Economics - SESSTIM UMR 912, Inserm IRD<br>Verger, Pierre; Aix Marseille Université , Aix Marseille School of Economics - SESSTIM UMR 912, Inserm IRD; ORS PACA, Observatoire Régional de la Santé Provence-Alpes-Côte d'Azur<br>Pulcini, Céline; Université Nice-Sophia Antipolis, Faculté de Médecine ; Aix Marseille Université , Aix Marseille School of Economics - SESSTIM UMR 912, Inserm IRD |
| <b>Primary Subject Heading</b>: | Infectious diseases                                                                                                                                                                                                                                                                                                                                                                                                                                                                                                                                                                                                                                                                                                                                                       |
| Secondary Subject Heading:      | General practice / Family practice                                                                                                                                                                                                                                                                                                                                                                                                                                                                                                                                                                                                                                                                                                                                        |
| Keywords:                       | INFECTIOUS DISEASES, PRIMARY CARE, Public health < INFECTIOUS DISEASES, Protocols & guidelines < HEALTH SERVICES ADMINISTRATION & MANAGEMENT, Quality in health care < HEALTH SERVICES ADMINISTRATION & MANAGEMENT                                                                                                                                                                                                                                                                                                                                                                                                                                                                                                                                                        |
|                                 |                                                                                                                                                                                                                                                                                                                                                                                                                                                                                                                                                                                                                                                                                                                                                                           |

SCHOLARONE™  
Manuscripts

**RESEARCH ARTICLE****Cross-sectional survey : Risk-averse French GPs use more rapid-antigen diagnostic tests in tonsillitis**

Audrey Michel-Lepage<sup>1,2</sup>, Bruno Ventelou<sup>1,3,4</sup>, Antoine Nebout<sup>1</sup>, Pierre Verger<sup>1,3</sup>, Céline Pulcini<sup>1,5,6</sup>

1. Aix Marseille Université (Aix Marseille School of Economics - SESSTIM UMR 912, Inserm IRD), Marseille, France

2. IHU, Fondation Méditerranée Infection, Marseille, France

3. ORS PACA, Observatoire Régional de la Santé Provence-Alpes-Côte d'Azur, Marseille, France

4. CNRS, U6579 (greqam), Marseille, France

5. CHU de Nice, Service d'Infectiologie, Nice, France

6. Université Nice-Sophia Antipolis, Faculté de Médecine, Nice, France

Corresponding author: Céline PULCINI. Centre Hospitalier Universitaire de Nice, Service d'Infectiologie, Hôpital l'Archet 1, 151 Route Saint Antoine de Ginestière, CS 23079, 06202 Nice Cedex 3, France. Tel: + 33 (0)4 92 03 55 15, Fax: + 33 (0)4 93 96 54 54, E-mail: [pulcini.c@chu-nice.fr](mailto:pulcini.c@chu-nice.fr)

**Keywords** : antibiotic prescription ; diagnosis ; near-patient testing ; point-of-care test ; risk aversion

Body text: 1365 words

14 references, 2 Tables

Short title: GPs' risk aversion behaviour

**ABSTRACT (264 words)**

**Objectives** - We tested the following hypotheses: (i) risk-averse general practitioners (GPs) might use more Rapid Antigen Diagnostic Tests (RADTs) in tonsillitis in order to decrease their diagnostic uncertainty; (ii) and GPs not using a RADT might prescribe more antibiotics when they are risk-averse.

**Design, setting and participants** - We conducted in 2012 a cross-sectional survey of a nationwide French representative sample of 1136 GPs.

**Outcome measures** - Multivariate analyses adjusted on the four stratification variables (age, gender, location and volume of activity) were performed in order to identify the risk aversion domains associated with indicators of good or poor practice.

**Results** – 69.4% of GPs were aware of national guidelines regarding tonsillitis and declared they had taken these guidelines into account for their last tonsillitis case. 59.5% declared they used a RADT in their last patient aged between 3-16 years presenting with tonsillitis; 29.3% of these tests were positive. Among the GPs who used a RADT, 30.7% prescribed an antibiotic; 98.4% did either prescribe an antibiotic because of a positive RADT result, or did not prescribe an antibiotic in view of a negative result. Among the GPs who did not use a RADT, 50.9% prescribed an antibiotic. In multivariate analyses, risk-averse GPs declared being more aware of and compliant with guidelines (OR=1.50, P<.01), and used RADTs more often in their last patient (OR=1.39, P<.01). Among GPs not using a RADT in their last patient, risk-averse GPs prescribed more antibiotics compared to risk-seeking doctors (OR=1.21, P<.05).

**Conclusions** - RADTs for tonsillitis are a powerful tool to decrease diagnostic uncertainty and unnecessary antibiotic prescriptions among GPs.

**ARTICLE SUMMARY****Article focus :**

- Risk-averse general practitioners (GPs) might use more Rapid Antigen Diagnostic Tests (RADTs) in tonsillitis in order to decrease their diagnostic uncertainty
- GPs not using a RADT might prescribe more antibiotics when they are risk-averse.

**Key messages :**

- Risk-averse GPs declared being more aware of and compliant with guidelines
- Risk-averse GPs used RADTs more often in their last patient (
- Among GPs not using a RADT in their last patient, risk-averse GPs prescribed more antibiotics compared to risk-seeking doctors.

**Strengths and limitations of this study :**

- First study to have assessed the impact of risk-aversion behaviour of physicians on antibiotic prescribing using a standardised measure scale.
- Based on declarative data, and not on real practices, but standardised questions allowed us to assess the true impact of risk aversion and clinical vignettes have been shown to be a valid tool for measuring the quality of physician practice.

## INTRODUCTION

Given the current worldwide bacterial resistance crisis, decreasing unnecessary antibiotic use is crucial. In France, 80% of all antibiotics used in humans are prescribed in the outpatient setting, and general practitioners (GPs) account for 71% of these prescriptions.[1]

Tonsillitis is one of the leading causes of antibiotic use in the outpatient setting.[2] Rapid Antigen Diagnostic Tests (RADTs) detecting group A streptococcal infections offer a useful mean to reduce unnecessary antibiotic prescriptions: the 2011 French guidelines recommend using these tests in all cases of tonsillitis in children  $\geq 3$  years old and prescribing antibiotics only in proven group A streptococcal infections (positive RADT result).[3] If a RADT is not available, the guidelines explicitly state that no antibiotic therapy is needed.[3] However, in France, RADTs are underused for patients presenting with tonsillitis.[4]

Non-compliance with guidelines can be explained by a variety of factors.[5] Several studies suggest that risk aversion may be a driver for unnecessary antibiotic prescriptions and non-compliance with guidelines regarding antibiotic prescriptions. At country level, « uncertainty avoidance » was recently identified in multivariate analysis as one of the national cultural dimensions significantly associated with (inappropriate) use of antibiotics for colds/flu/sore throats,[6] confirming previous findings.[7] At the individual level, recent reviews of qualitative studies identified diagnostic uncertainty as an important factor favouring antibiotic misuse.[8, 9]

In this survey of a nationwide French representative sample of GPs, we wanted to assess the following hypotheses, taking tonsillitis as an example: (i) risk-averse GPs might use more RADTs in order to decrease their diagnostic uncertainty; (ii) and GPs not using a RADT might prescribe more antibiotics when they are risk-averse.

## MATERIAL AND METHODS

### Sampling

A panel of French GPs was constituted in June 2010. Its procedures have already been described elsewhere.[4] Briefly, 5170 GPs were selected by random sampling from the Ministry of Health's exhaustive database of health professionals in France. Sampling was stratified for location of the general practice (urban, peri-urban, or rural areas), gender, age (<49, 49–56, >56 years old) and the number of consultations (<2849, 2849–5494, >5494) in 2008. Of the 3888 contacted and eligible GPs, 1431 (36.8%) agreed to participate in the panel, i.e. to provide regular data on their activity and respond to 5 consecutive surveys on different topics during a 30-month period. The results presented in this study are based on the 1136 GPs who participated in the fifth national cross-sectional survey, conducted in Novembre 2012 (attrition rate between the first and fifth cross-sectional surveys: 20.6%).

### Ethics Statement

The National Data Protection Authority (Commission Nationale Informatique et Libertés), responsible for ethical issues and protection of individual data in France, approved the panel and its procedures.

### Procedure and questionnaire

Professional investigators contacted the GPs and interviewed them with computer-assisted telephone interview software, using a standardised questionnaire (supplementary file). It collected information about their professional characteristics, their practices regarding tonsillitis, and their risk aversion attitudes for daily life in general, personal finances and medical behaviour regarding patients' health, using a Likert scale from 0 (not at all inclined to take risks) to 10 (totally inclined to take risks).[10, 11] We considered a scoring below or equal to 5 to be risk-averse.[10, 11] From the questionnaire we studied the following indicators of compliance with tonsillitis guidelines: awareness and use of national tonsillitis guidelines (indicator 1, reflecting good practice); use of a RADT in the last patient aged between 3–16 years presenting a tonsillitis (indicator 2, good practice); among GPs who declared using a RADT, antibiotic prescription in case of a positive RADT result and absence of antibiotic

1  
2  
3 prescription in case of a negative RADT result (indicator 3, good practice); and among GPs who did  
4 not use a RADT, prescription of an antibiotic (indicator 4, reflecting poor practice).  
5  
6  
7

### 8 9 **Statistical analysis**

10 Due to the panel participants' characteristics, we weighted the data in order to obtain a representative  
11 sample of the national French GP population for age, gender, location and volume of activity. For  
12 indicators 1 and 2, multivariate logistic regressions adjusted on the four stratification variables were  
13 performed, and for indicators 3 and 4 sample selection models in two steps were used to identify the  
14 risk aversion domains associated with indicators of good or poor practice in order to take into account  
15 the selection effect of the sample. In the first step, the dependent variable was the use of RADTs; in  
16 the second step, the dependent variable was either indicators 3 or 4. The stratification variables were  
17 computed in the first step of the model. All analyses were performed using SAS 9.3®.  
18  
19  
20  
21  
22  
23  
24  
25  
26  
27  
28  
29  
30  
31  
32  
33  
34  
35  
36  
37  
38  
39  
40  
41  
42  
43  
44  
45  
46  
47  
48  
49  
50  
51  
52  
53  
54  
55  
56  
57  
58  
59  
60

## RESULTS

The socio-demographic characteristics of the participants are presented in Table 1. 69.4% of GPs were aware of national guidelines regarding tonsillitis and declared they had taken these guidelines into account for their last tonsillitis case (indicator 1). 59.5% declared they used a RADT in their last patient aged between 3-16 years presenting with tonsillitis (indicator 2); 29.3% of these tests were positive and antibiotics were prescribed in 30.7% of the cases when a RADT was used. Among the GPs who used a RADT, 98.4% did either prescribe an antibiotic therapy because of a positive RADT result, or did not prescribe an antibiotic therapy in view of a negative result (indicator 3). Among the GPs who did not use a RADT, 50.9% prescribed an antibiotic (indicator 4).

### Risk aversion behaviour

The prevalence of risk-averse GPs for the three following domains was as follows: 42.1% for the daily life scale, 59.3% for the personal finances one and 67.6% for the medical behaviour regarding patients' health scale.

### Association between practices and risk aversion behaviour (Table 2)

Risk-averse GPs declared being more aware of and compliant with guidelines, and used RADTs more often in their last patient. Among GPs not using a RADT in their last patient, risk-averse GPs prescribed more antibiotics compared to risk-seeking doctors.



## DISCUSSION

Our two hypotheses were verified: we found that risk-averse GPs were using RADTs more often and that risk-aversion behaviour was associated with an increase in antibiotic prescriptions when RADTs were not used. Since the literature suggests that risk aversion may be a driver for unnecessary antibiotic prescriptions, the leverage effect of RADTs appears to be all the more powerful since GPs are risk-averse. It seems that the diagnostic uncertainty leading to unnecessary antibiotic prescriptions in tonsillitis leaves room for an increased use of RADTs and, as a consequence, for a decreased use of antibiotics in risk-averse GPs using a RADT. RADTs indeed decrease diagnostic uncertainty, in accordance with previous findings.[6-9, 12] These tests are thus a very useful strategy to decrease unnecessary antibiotic prescriptions. Since the financial risk aversion domain was frequently involved, financial incentives regarding antibiotic use might have an impact on practices.

Two practical strategies could then decrease GPs' diagnostic uncertainty: the use of RADT and the teaching of communication skills (how to communicate with a patient in case of diagnostic uncertainty). Hrisos et al. indeed demonstrated that a theory-based intervention ("persuasive communication") resulted in lower rates of antibiotic prescribing on patient scenarios compared to a control group for upper respiratory tract infections, partly by reducing the GPs' risk perception.[13] RADTs can also support GPs' explanations to the patients that antibiotics are unnecessary.[9, 12] Delayed prescriptions may also help, as GPs can offer patients easy access to an antibiotic at a later time.[8, 9]

Our study brings out original findings, and is the first, to the best of our knowledge, to have assessed the risk-aversion behaviour of physicians using a standardised measure scale. It is based on declarative data, and not on real practices, and this could be a limitation; however, standardised questions allowed us to assess the true impact of risk aversion. Furthermore, clinical vignettes have been shown to be a valid tool for measuring the quality of physician practice.[14]

In conclusion, RADTs for tonsillitis are a powerful tool to decrease diagnostic uncertainty among GPs, and to reduce unnecessary antibiotic prescriptions. Risk-aversion has then a dual effect: on the one hand, it induces GPs to use more RADTs (and as a consequence to prescribe less antibiotics), but

1  
2  
3  
4  
5  
6  
7  
8  
9  
10  
11  
12  
13  
14  
15  
16  
17  
18  
19  
20  
21  
22  
23  
24  
25  
26  
27  
28  
29  
30  
31  
32  
33  
34  
35  
36  
37  
38  
39  
40  
41  
42  
43  
44  
45  
46  
47  
48  
49  
50  
51  
52  
53  
54  
55  
56  
57  
58  
59  
60

it also induces GPs to prescribe more antibiotics on the other hand when RADTs are not used. These results show the importance of RADT to struggle against “uncertainty avoidance”.

For peer review only

**Table 1 : Socio-demographic characteristics of the 1136 General Practitioners (GPs).**

| <b>GPs' characteristics</b>                                   |             | <b>%</b> |
|---------------------------------------------------------------|-------------|----------|
| Gender                                                        | Male        | 72.8     |
|                                                               | Female      | 27.2     |
| Age (years)                                                   | < 45        | 20.9     |
|                                                               | 45-54       | 35.9     |
|                                                               | > 54        | 43.2     |
| <b>Medical practice characteristics</b>                       |             |          |
| Location of practice                                          | Urban       | 21.0     |
|                                                               | Peri-urban  | 18.5     |
|                                                               | Rural       | 60.5     |
| Volume of activity (number of annual consultations)           | < 2849      | 20.4     |
|                                                               | 2849 – 5494 | 54.3     |
|                                                               | > 5494      | 25.3     |
| <b>Indicators of good practice</b>                            |             |          |
| Awareness and use of tonsillitis guidelines                   | Yes         | 69.4     |
|                                                               | No          | 30.6     |
| Use of a RADT in the last patient                             | Yes         | 59.5     |
|                                                               | No          | 40.5     |
| Good antibiotic prescription practices among GPs using a RADT | Yes         | 98.4     |
|                                                               | No          | 1.6      |
| <b>Indicator of poor practice</b>                             |             |          |
| Antibiotic prescriptions among GPs not using a RADT           | Yes         | 50.9     |
|                                                               | No          | 49.1     |
| <b>GPs' risk-aversion behaviour</b>                           |             |          |
| Daily life                                                    | Risk-averse | 42.1     |

1  
2  
3  
4  
5  
6  
7  
8  
9  
10  
11  
12  
13  
14  
15  
16  
17  
18  
19  
20  
21  
22  
23  
24  
25  
26  
27  
28  
29  
30  
31  
32  
33  
34  
35  
36  
37  
38  
39  
40  
41  
42  
43  
44  
45  
46  
47  
48  
49  
50  
51  
52  
53  
54  
55  
56  
57  
58  
59  
60

|                                              |              |      |
|----------------------------------------------|--------------|------|
|                                              | Risk-seeking | 57.9 |
| Medical behaviour regarding patients' health | Risk-averse  | 67.6 |
|                                              | Risk-seeking | 32.4 |
| Personal finances                            | Risk-averse  | 59.3 |
|                                              | Risk-seeking | 40.7 |

RADT : Rapid Antigen Diagnostic Test

For peer review only

1  
2  
3  
4  
5  
6  
7  
8  
9  
10  
11  
12  
13  
14  
15  
16  
17  
18  
19  
20  
21  
22  
23  
24  
25  
26  
27  
28  
29  
30  
31  
32  
33  
34  
35  
36  
37  
38  
39  
40  
41  
42  
43  
44  
45  
46  
47  
48  
49  
50  
51  
52  
53  
54  
55  
56  
57  
58  
59  
60

For peer review only

Table 2 : Association between declared practices regarding tonsillitis and risk aversion behaviour, in multivariate analysis (N= 1136)

| Variables                   | %                                                               | OR           | %                                                     | OR            | %                                                                                              | OR            | %                                                                                    | OR             |
|-----------------------------|-----------------------------------------------------------------|--------------|-------------------------------------------------------|---------------|------------------------------------------------------------------------------------------------|---------------|--------------------------------------------------------------------------------------|----------------|
|                             | Indicator 1 :<br>Awareness and use of<br>tonsillitis guidelines |              | Indicator 2 :<br>Use of a RADT in the<br>last patient |               | Indicator 3 :<br>Good antibiotic prescription practices<br>among GPs using a RADT <sup>a</sup> |               | Indicator 4 :<br>Antibiotic prescriptions among<br>GPs not using a RADT <sup>a</sup> |                |
| <b>GPs' characteristics</b> |                                                                 |              |                                                       |               |                                                                                                |               |                                                                                      |                |
| Gender                      |                                                                 |              |                                                       |               |                                                                                                |               |                                                                                      |                |
| Male                        | 66.6                                                            | 1            | 55.4                                                  | 1             | 98.1                                                                                           | 1             | 54.7                                                                                 | 1              |
| Female                      | 76.9                                                            | <b>1.47*</b> | 70.6                                                  | <b>1.63**</b> | 99.1                                                                                           | <b>1.28**</b> | 35.8                                                                                 | <b>1.32***</b> |
| Age                         |                                                                 |              |                                                       |               |                                                                                                |               |                                                                                      |                |
| < 45                        | 78.8                                                            | 1.36         | 75.1                                                  | <b>1.75**</b> | 100                                                                                            | <b>1.34**</b> | 36.3                                                                                 | <b>1.31**</b>  |
| 45-54                       | 72.0                                                            | 1            | 60.9                                                  | 1             | 97.6                                                                                           | 1             | 44.4                                                                                 | 1              |
| > 54                        | 62.4                                                            | <b>0.70*</b> | 50.8                                                  | <b>0.68**</b> | 97.9                                                                                           | <b>0.77**</b> | 59.0                                                                                 | <b>0.73***</b> |
| Location of<br>practice     |                                                                 |              |                                                       |               |                                                                                                |               |                                                                                      |                |
| Urban                       | 65.7                                                            | 0.88         | 60.7                                                  | 1.25          | 99.6                                                                                           | 1.15          | 55.4                                                                                 | 1.08           |
| Peri-urban                  | 73.3                                                            | 1.20         | 66.6                                                  | <b>1.51*</b>  | 99.4                                                                                           | <b>1.28**</b> | 51.1                                                                                 | <b>1.21*</b>   |
| Rural                       | 69.5                                                            | 1            | 57.0                                                  | 1             | 97.6                                                                                           | 1             | 49.5                                                                                 | 1              |
| Volume of<br>activity       |                                                                 |              |                                                       |               |                                                                                                |               |                                                                                      |                |
| < 2849                      | 66.4                                                            | 0.78         | 55.3                                                  | <b>0.69*</b>  | 98.6                                                                                           | <b>0.77*</b>  | 49.5                                                                                 | 0.82           |
| 2849-5494                   | 70.9                                                            | 1            | 63.6                                                  | 1             | 98.4                                                                                           | 1             | 51.6                                                                                 | 1              |
| > 5494                      | 68.6                                                            | 0.97         | 54.2                                                  | <b>0.74*</b>  | 98.0                                                                                           | <b>0.80*</b>  | 50.9                                                                                 | 0.87           |

| Domains of risk-aversion |      |               |      |               |      |              |      |              |
|--------------------------|------|---------------|------|---------------|------|--------------|------|--------------|
| Daily life               |      |               |      |               |      |              |      |              |
| Risk-averse              | 70.1 | 1.06          | 60.9 | 1.10          | 97.8 | 0.74         | 55.5 | <b>1.21*</b> |
| Risk-seeking             | 68.2 | 1             | 59.4 | 1             | 98.9 | 1            | 51.8 | 1            |
| Patients' health         |      |               |      |               |      |              |      |              |
| Risk-averse              | 72.6 | <b>1.50**</b> | 60.7 | 1.14          | 99.4 | <b>1.64*</b> | 49.6 | 1.01         |
| Risk-seeking             | 61.4 | 1             | 57.4 | 1             | 96.3 | 1            | 57.5 | 1            |
| Personal finances        |      |               |      |               |      |              |      |              |
| Risk-averse              | 73.1 | <b>1.47**</b> | 63.1 | <b>1.39**</b> | 98.4 | 0.97         | 51.9 | 1.16         |
| Risk-seeking             | 64.9 | 1             | 55.7 | 1             | 98.5 | 1            | 52.1 | 1            |

\* : P<.05 ; \*\* : P<.01 ; \*\*\* : P<.001

RADT : Rapid Antigen Diagnostic Test

<sup>a</sup> Sample selection models in two steps were performed to take into account the selection effect of the sample ; for these models, all three domains of risk aversion were entered in the model 1 by 1. OR cannot be obtained directly from these models, but they were calculated from the marginal effects.

## ACKNOWLEDGEMENTS

We thank all GPs who participated to the survey as well as members of the supervisory committee of the French Panel of General Practices.

## COMPETING INTERESTS STATEMENT

The authors declare no conflicts of interest.

## FUNDING

The French Panel of General Practices received funding from Direction de la Recherche, des Etudes, de l'Evaluation et des Statistiques (DREES) - Ministère du travail, des relations sociales, de la famille, de la solidarité et de la ville, Ministère de la santé et des sports, through a multiannual agreement on objectives. The work of C.P. was supported by the "Méditerranée Infection" foundation (a non profit-making foundation, <http://www.mediterranee-infection.com/>), which paid for her accommodation and travel expenses when coming to Marseille. A.M.L. received a Ph.D. grant from the same "Méditerranée Infection" foundation. A.N. was supported by "Aix Marseille School of Economics". None of the above bodies had any role in study design; the collection, analysis, and interpretation of data; the writing of the paper; or the decision to submit this paper for publication.

## AUTHORSHIP/CONTRIBUTION

C.P., A.N. and B.V. designed the study. C.P. wrote the article. A.M.L. performed the statistical analysis. A.M.L., A.N., B.V. and P.V. reviewed the study protocol and the article.

## DATA SHARING

The survey data are not currently publicly available.



## REFERENCES

1. Agence Nationale de Sécurité du Médicament et des Produits de Santé. Dix ans d'évolution des consommations d'antibiotiques en France. 2013.
2. Chahwakilian P, Huttner B, Schlemmer B et al. Impact of the French campaign to reduce inappropriate ambulatory antibiotic use on the prescription and consultation rates for respiratory tract infections. *J Antimicrob Chemother* 2011; **66**: 2872-9.
3. Société de Pathologie Infectieuse de Langue Française. Antibiothérapie par voie générale en pratique courante dans les infections respiratoires hautes de l'adulte et l'enfant. 2011.
4. Pulcini C, Pauvif L, Paraponaris A et al. Perceptions and attitudes of French general practitioners towards rapid antigen diagnostic tests in acute pharyngitis using a randomized case vignette study. *J Antimicrob Chemother* 2012; **67**: 1540-6.
5. Cabana MD, Rand CS, Powe NR et al. Why don't physicians follow clinical practice guidelines? A framework for improvement. *JAMA* 1999; **282**: 1458-65.
6. Borg MA. National cultural dimensions as drivers of inappropriate ambulatory care consumption of antibiotics in Europe and their relevance to awareness campaigns. *J Antimicrob Chemother* 2012; **67**: 763-7.
7. Deschepper R, Grigoryan L, Lundborg CS et al. Are cultural dimensions relevant for explaining cross-national differences in antibiotic use in Europe? *BMC Health Serv Res* 2008; **8**: 123.
8. Teixeira Rodrigues A, Roque F, Falcao A et al. Understanding physician antibiotic prescribing behaviour: a systematic review of qualitative studies. *Int J Antimicrob Agents* 2013; **41**: 203-12.
9. Tonkin-Crine S, Yardley L, Little P. Antibiotic prescribing for acute respiratory tract infections in primary care: a systematic review and meta-ethnography. *J Antimicrob Chemother* 2011; **66**: 2215-23.
10. Arrondel L, Calvo Pardo H. Les Français sont-ils prudents ? Patrimoine et risque sur le marché du travail. *Economie et Statistique* 2008; **417-418**: 27-53.
11. Dohmen T, Falk A, Huffman D, Sunde U. The Intergenerational Transmission of Risk and Trust Attitudes, *Rev Econ Stud* 2012; **79**: 645-677.

- 1  
2  
3 12. Leydon GM, McDermott L, Moore M et al. A qualitative study of GP, NP and patient views  
4 about the use of rapid streptococcal antigen detection tests (RADTs) in primary care: 'swamped with  
5 sore throats?'. *BMJ Open* 2013; **3**.  
6  
7  
8  
9 13. Hrisos S, Eccles M, Johnston M et al. An intervention modelling experiment to change GPs'  
10 intentions to implement evidence-based practice: using theory-based interventions to promote GP  
11 management of upper respiratory tract infection without prescribing antibiotics. *BMC Health Serv Res*  
12 2008; **8**: 10.  
13  
14  
15  
16  
17 14. Veloski J, Tai S, Evans AS et al. Clinical vignette-based surveys: a tool for assessing  
18 physician practice variation. *Am J Med Qual* 2005; **20**: 151-7.  
19  
20  
21  
22  
23  
24  
25  
26  
27  
28  
29  
30  
31  
32  
33  
34  
35  
36  
37  
38  
39  
40  
41  
42  
43  
44  
45  
46  
47  
48  
49  
50  
51  
52  
53  
54  
55  
56  
57  
58  
59  
60

## QUESTIONNAIRE

**Antibiotic use - Tonsillitis**

1. In your last patient with tonsillitis, aged 3 to 16 years old, did you use a rapid antigen diagnostic test (RADT) ?

- A. Yes
- B. No => go to question 3
- C. Do not know (answer not cited by the investigator)

If yes,

2. The result of the RADT was :

- A. Positive
- B. Negative
- C. Do not know (answer not cited by the investigator)

3. Did you prescribe an antibiotic ?

- A. Yes
- B. No
- C. Do not know (answer not cited by the investigator)

4. Are you aware of national guidelines regarding the management of upper respiratory tract infections in children ?

- A. Yes
- B. No
- C. Do not know (answer not cited by the investigator)

If yes,

5. Did you take these guidelines into account to manage your last paediatric patient with tonsillitis ?

- A. Yes
- B. No
- C. Do not know (answer not cited by the investigator)

**Risk aversion attitudes**

In this part, we will ask you some questions regarding your attitudes towards situations in a context of uncertainty, and their impact on your practices.

Please take into account the perceptions you have from yourself.

In the following domains, where would you place yourself, from 0 to 10, 0 being « not at all inclined to take risks » and 10 being « totally inclined to take risks » ?

1. First, in the different domains of daily life :

0 / 1 / 2 ..... 9 / 10

2. Then, for the management of your personal finances :

0 / 1 / 2 ..... 9 / 10

3. Finally, regarding your medical behaviour for your patients' health :

0 / 1 / 2 ..... 9 / 10

STROBE 2007 (v4) Statement—Checklist of items that should be included in reports of *cross-sectional studies*

| Section/Topic                | Item # | Recommendation                                                                                                                                                                       | Reported on page # |
|------------------------------|--------|--------------------------------------------------------------------------------------------------------------------------------------------------------------------------------------|--------------------|
| Title and abstract           | 1      | (a) Indicate the study’s design with a commonly used term in the title or the abstract                                                                                               | 1                  |
|                              |        | (b) Provide in the abstract an informative and balanced summary of what was done and what was found                                                                                  | 2                  |
| <b>Introduction</b>          |        |                                                                                                                                                                                      |                    |
| Background/rationale         | 2      | Explain the scientific background and rationale for the investigation being reported                                                                                                 | 4                  |
| Objectives                   | 3      | State specific objectives, including any prespecified hypotheses                                                                                                                     | 4                  |
| <b>Methods</b>               |        |                                                                                                                                                                                      |                    |
| Study design                 | 4      | Present key elements of study design early in the paper                                                                                                                              | 5                  |
| Setting                      | 5      | Describe the setting, locations, and relevant dates, including periods of recruitment, exposure, follow-up, and data collection                                                      | 5                  |
| Participants                 | 6      | (a) Give the eligibility criteria, and the sources and methods of selection of participants                                                                                          | 5                  |
| Variables                    | 7      | Clearly define all outcomes, exposures, predictors, potential confounders, and effect modifiers. Give diagnostic criteria, if applicable                                             | 5-6                |
| Data sources/<br>measurement | 8*     | For each variable of interest, give sources of data and details of methods of assessment (measurement). Describe comparability of assessment methods if there is more than one group | 5                  |
| Bias                         | 9      | Describe any efforts to address potential sources of bias                                                                                                                            | 5                  |
| Study size                   | 10     | Explain how the study size was arrived at                                                                                                                                            | NA                 |
| Quantitative variables       | 11     | Explain how quantitative variables were handled in the analyses. If applicable, describe which groupings were chosen and why                                                         | 5                  |
| Statistical methods          | 12     | (a) Describe all statistical methods, including those used to control for confounding                                                                                                | 6                  |
|                              |        | (b) Describe any methods used to examine subgroups and interactions                                                                                                                  | 6                  |
|                              |        | (c) Explain how missing data were addressed                                                                                                                                          | NA                 |
|                              |        | (d) If applicable, describe analytical methods taking account of sampling strategy                                                                                                   | 6                  |
|                              |        | (e) Describe any sensitivity analyses                                                                                                                                                | NA                 |
| <b>Results</b>               |        |                                                                                                                                                                                      |                    |

|                          |     |                                                                                                                                                                                                              |    |
|--------------------------|-----|--------------------------------------------------------------------------------------------------------------------------------------------------------------------------------------------------------------|----|
| Participants             | 13* | (a) Report numbers of individuals at each stage of study—eg numbers potentially eligible, examined for eligibility, confirmed eligible, included in the study, completing follow-up, and analysed            | 7  |
|                          |     | (b) Give reasons for non-participation at each stage                                                                                                                                                         | 5  |
|                          |     | (c) Consider use of a flow diagram                                                                                                                                                                           | NA |
| Descriptive data         | 14* | (a) Give characteristics of study participants (eg demographic, clinical, social) and information on exposures and potential confounders                                                                     | 7  |
|                          |     | (b) Indicate number of participants with missing data for each variable of interest                                                                                                                          | NA |
| Outcome data             | 15* | Report numbers of outcome events or summary measures                                                                                                                                                         | 7  |
| Main results             | 16  | (a) Give unadjusted estimates and, if applicable, confounder-adjusted estimates and their precision (eg, 95% confidence interval). Make clear which confounders were adjusted for and why they were included | 7  |
|                          |     | (b) Report category boundaries when continuous variables were categorized                                                                                                                                    | NA |
|                          |     | (c) If relevant, consider translating estimates of relative risk into absolute risk for a meaningful time period                                                                                             | NA |
| Other analyses           | 17  | Report other analyses done—eg analyses of subgroups and interactions, and sensitivity analyses                                                                                                               | NA |
| <b>Discussion</b>        |     |                                                                                                                                                                                                              |    |
| Key results              | 18  | Summarise key results with reference to study objectives                                                                                                                                                     | 8  |
| Limitations              | 19  | Discuss limitations of the study, taking into account sources of potential bias or imprecision. Discuss both direction and magnitude of any potential bias                                                   | 8  |
| Interpretation           | 20  | Give a cautious overall interpretation of results considering objectives, limitations, multiplicity of analyses, results from similar studies, and other relevant evidence                                   | 8  |
| Generalisability         | 21  | Discuss the generalisability (external validity) of the study results                                                                                                                                        | 8  |
| <b>Other information</b> |     |                                                                                                                                                                                                              |    |
| Funding                  | 22  | Give the source of funding and the role of the funders for the present study and, if applicable, for the original study on which the present article is based                                                | 14 |

\*Give information separately for cases and controls in case-control studies and, if applicable, for exposed and unexposed groups in cohort and cross-sectional studies.

**Note:** An Explanation and Elaboration article discusses each checklist item and gives methodological background and published examples of transparent reporting. The STROBE checklist is best used in conjunction with this article (freely available on the Web sites of PLoS Medicine at <http://www.plosmedicine.org/>, Annals of Internal Medicine at <http://www.annals.org/>, and Epidemiology at <http://www.epidem.com/>). Information on the STROBE Initiative is available at [www.strobe-statement.org](http://www.strobe-statement.org).



**Cross-sectional survey : Risk-averse French GPs use more rapid-antigen diagnostic tests in tonsillitis in children**

|                                 |                                                                                                                                                                                                                                                                                                                                                                                                                                                                                                                                                                                                                                                                                                                                                                           |
|---------------------------------|---------------------------------------------------------------------------------------------------------------------------------------------------------------------------------------------------------------------------------------------------------------------------------------------------------------------------------------------------------------------------------------------------------------------------------------------------------------------------------------------------------------------------------------------------------------------------------------------------------------------------------------------------------------------------------------------------------------------------------------------------------------------------|
| Journal:                        | <i>BMJ Open</i>                                                                                                                                                                                                                                                                                                                                                                                                                                                                                                                                                                                                                                                                                                                                                           |
| Manuscript ID:                  | bmjopen-2013-003540.R1                                                                                                                                                                                                                                                                                                                                                                                                                                                                                                                                                                                                                                                                                                                                                    |
| Article Type:                   | Research                                                                                                                                                                                                                                                                                                                                                                                                                                                                                                                                                                                                                                                                                                                                                                  |
| Date Submitted by the Author:   | 03-Sep-2013                                                                                                                                                                                                                                                                                                                                                                                                                                                                                                                                                                                                                                                                                                                                                               |
| Complete List of Authors:       | Michel-Lepage, Audrey; Aix Marseille Université , Aix Marseille School of Economics - SESSTIM UMR 912, Inserm IRD; IHU, Fondation Méditerranée Infection<br>Ventelou, Bruno; Aix Marseille Université , Aix Marseille School of Economics - SESSTIM UMR 912, Inserm IRD; CNRS, U6579 (greqam)<br>Nebout, Antoine; Aix Marseille Université , Aix Marseille School of Economics - SESSTIM UMR 912, Inserm IRD<br>Verger, Pierre; Aix Marseille Université , Aix Marseille School of Economics - SESSTIM UMR 912, Inserm IRD; ORS PACA, Observatoire Régional de la Santé Provence-Alpes-Côte d'Azur<br>Pulcini, Céline; Université Nice-Sophia Antipolis, Faculté de Médecine ; Aix Marseille Université , Aix Marseille School of Economics - SESSTIM UMR 912, Inserm IRD |
| <b>Primary Subject Heading</b>: | Infectious diseases                                                                                                                                                                                                                                                                                                                                                                                                                                                                                                                                                                                                                                                                                                                                                       |
| Secondary Subject Heading:      | General practice / Family practice                                                                                                                                                                                                                                                                                                                                                                                                                                                                                                                                                                                                                                                                                                                                        |
| Keywords:                       | INFECTIOUS DISEASES, PRIMARY CARE, Public health < INFECTIOUS DISEASES, Protocols & guidelines < HEALTH SERVICES ADMINISTRATION & MANAGEMENT, Quality in health care < HEALTH SERVICES ADMINISTRATION & MANAGEMENT                                                                                                                                                                                                                                                                                                                                                                                                                                                                                                                                                        |
|                                 |                                                                                                                                                                                                                                                                                                                                                                                                                                                                                                                                                                                                                                                                                                                                                                           |

SCHOLARONE™  
Manuscripts

**RESEARCH ARTICLE****Cross-sectional survey : Risk-averse French GPs use more rapid-antigen diagnostic tests in tonsillitis in children**

Audrey Michel-Lepage<sup>1,2</sup>, Bruno Ventelou<sup>1,3,4</sup>, Antoine Nebout<sup>1,7</sup>, Pierre Verger<sup>1,3</sup>, Céline Pulcini<sup>1,5,6</sup>

1. Aix Marseille Université (Aix Marseille School of Economics - SESSTIM UMR 912, Inserm IRD), Marseille, France

2. IHU, Fondation Méditerranée Infection, Marseille, France

3. ORS PACA, Observatoire Régional de la Santé Provence-Alpes-Côte d'Azur, Marseille, France

4. CNRS, U6579 (greqam), Marseille, France

5. CHU de Nice, Service d'Infectiologie, Nice, France

6. Université Nice-Sophia Antipolis, Faculté de Médecine, Nice, France

7. INRA, UR 1303 ALISS, F-94200 Ivry-sur-Seine, France

Corresponding author: Céline PULCINI. Centre Hospitalier Universitaire de Nice, Service d'Infectiologie, Hôpital l'Archet 1, 151 Route Saint Antoine de Ginestière, CS 23079, 06202 Nice Cedex 3, France. Tel: + 33 (0)4 92 03 55 15, Fax: + 33 (0)4 93 96 54 54, E-mail: [pulcini.c@chu-nice.fr](mailto:pulcini.c@chu-nice.fr)

**Keywords** : antibiotic prescription ; diagnosis ; near-patient testing ; point-of-care test ; risk aversion

Body text: 1493 words

13 references, 2 Tables

Short title: GPs' risk attitudes and tonsillitis

**ABSTRACT (282 words)**

**Objectives** - We tested the following hypotheses: (i) risk-averse general practitioners (GPs) might use more Rapid Antigen Diagnostic Tests (RADTs) in tonsillitis in children, probably to decrease their diagnostic uncertainty regarding the aetiology of the disease (viral versus due to group A *Streptococcus*); (ii) and GPs not using a RADT might prescribe more antibiotics when they are risk-averse.

**Design, setting and participants** - We conducted in 2012 a cross-sectional survey of a nationwide French representative sample of 1093 GPs.

**Outcome measures** - Multivariate analyses adjusted on the four stratification variables (age, gender, location and volume of activity, i.e. the number of annual consultations) were performed in order to identify the risk domains associated with indicators of good or poor practice.

**Results** – 69.4% of GPs were aware of national guidelines regarding tonsillitis and declared they had taken these guidelines into account for their last paediatric tonsillitis case. 59.1% declared they used a RADT in their last patient aged between 3-16 years presenting with tonsillitis; 29.7% of these tests were positive. Among the GPs who used a RADT, 30.7% prescribed an antibiotic; 98.3% did either prescribe an antibiotic because of a positive RADT result, or did not prescribe an antibiotic in view of a negative result. Among the GPs who did not use a RADT, 50.7% prescribed an antibiotic. In multivariate analyses, risk-averse GPs declared being more aware of and compliant with guidelines (OR=1.56, P<.01), and used RADTs more often for their last patient (OR=1.30, P<.05). Among GPs not using a RADT in their last patient, risk-averse GPs prescribed more antibiotics compared to risk-tolerant doctors (OR=1.18, P<.05).

**Conclusions** – Individual risk attitudes influenced GPs' practices in tonsillitis, particularly the use of RADTs and antibiotic prescriptions.



## ARTICLE SUMMARY

### Article focus :

- Risk-averse general practitioners (GPs) might use more Rapid Antigen Diagnostic Tests (RADTs) in tonsillitis in children, probably to decrease their diagnostic uncertainty regarding the aetiology of the disease (viral versus due to group A *Streptococcus*).
- GPs not using a RADT might prescribe more antibiotics when they are risk-averse.

### Key messages :

- Risk-averse GPs declared being more aware of and compliant with guidelines.
- Risk-averse GPs used RADTs more often in their last paediatric patient.
- Among GPs not using a RADT in their last patient, risk-averse GPs prescribed more antibiotics compared to risk-tolerant doctors.

### Strengths and limitations of this study :

- First study to have assessed the impact of individual risk attitudes of physicians on antibiotic prescribing using a standardised measure scale.
- Based on declarative data, and not on real practices, but standardised questions allowed us to assess the true impact of individual risk attitudes and clinical vignettes have been shown to be a valid tool for measuring the quality of physician practice.

## INTRODUCTION

Given the current worldwide bacterial resistance crisis, decreasing unnecessary antibiotic use is crucial. In France, 80% of all antibiotics used in humans are prescribed in the outpatient setting, and general practitioners (GPs) account for 71% of these prescriptions.[1]

Tonsillitis is one of the leading causes of antibiotic use in the outpatient setting.[2] Rapid Antigen Diagnostic Tests (RADTs) detecting group A streptococcal infections offer a useful mean to reduce unnecessary antibiotic prescriptions: the 2011 French guidelines recommend using these tests in all cases of tonsillitis in children  $\geq 3$  years old and prescribing antibiotics only in proven group A streptococcal infections (positive RADT result).[3] If a RADT is not available, the guidelines explicitly state that no antibiotic therapy is needed.[3] However, in France, RADTs are underused for patients presenting with tonsillitis.[4]

Non-compliance with guidelines can be explained by a variety of factors.[5] At country level, « uncertainty avoidance » was recently identified in multivariate analysis as one of the national cultural dimensions significantly associated with (inappropriate) use of antibiotics for colds/flu/sore throats,[6] confirming previous findings.[7] France is a country with a high uncertainty avoidance score.[6-7] At the individual level, recent reviews of qualitative studies identified diagnostic uncertainty as an important factor favouring antibiotic misuse.[8, 9] Risk aversion slightly differs from uncertainty avoidance, but, as a close concept largely used in economics, it was interesting to know whether it might play a role in antibiotic prescribing and the use of rapid diagnostic tests in tonsillitis. On the one hand, RADTs decrease diagnostic uncertainty, by establishing that the tonsillitis is bacterial (group A streptococcal infection). One may hypothesize that risk-averse GPs might use RADTs more often, possibly as a way to decrease their diagnostic uncertainty. On the other hand, if GPs are not using RADTs, clinical findings do not allow to reliably differentiate between viral and bacterial tonsillitis.[3] Thus, one may hypothesize that risk-averse GPs might prescribe more antibiotics when they are not using RADTs since they may be more sensitive to diagnostic uncertainty than risk-tolerant GPs. Consequently, diagnostic uncertainty might lead here to unnecessary antibiotic prescriptions.

1  
2  
3 In this survey of a nationwide French representative sample of GPs, we wanted to assess the following  
4 hypotheses, taking tonsillitis as an example: (i) risk-averse GPs might use more RADTs, probably to  
5 decrease their diagnostic uncertainty regarding the aetiology of the disease (viral versus due to group  
6  
7 *A Streptococcus*); (ii) and GPs not using a RADT might prescribe more antibiotics when they are risk-  
8  
9  
10  
11  
12  
13  
14  
15  
16  
17  
18  
19  
20  
21  
22  
23  
24  
25  
26  
27  
28  
29  
30  
31  
32  
33  
34  
35  
36  
37  
38  
39  
40  
41  
42  
43  
44  
45  
46  
47  
48  
49  
50  
51  
52  
53  
54  
55  
56  
57  
58  
59  
60

For peer review only

## MATERIAL AND METHODS

### Sampling

A panel of French GPs was constituted in June 2010. Its procedures have already been described elsewhere.[4] Briefly, 5170 GPs were selected by random sampling from the Ministry of Health's exhaustive database of health professionals in France. Sampling was stratified for location of the general practice (urban, peri-urban, or rural areas), gender, age (<49, 49–56, >56 years old) and the number of consultations (<2849, 2849–5494, >5494) in 2008. Of the 3888 contacted and eligible GPs, 1431 (36.8%) agreed to participate in the panel, i.e. to provide regular data on their activity and respond to 5 consecutive surveys on different topics during a 30-month period. Among the 1136 GPs who participated in the fifth national cross-sectional survey, conducted in Novembre 2012 (attrition rate between the first and fifth cross-sectional surveys: 20.6%), the results presented in this study are based on 1093 GPs (43 missing values).

### Ethics Statement

The National Data Protection Authority (Commission Nationale Informatique et Libertés), responsible for ethical issues and protection of individual data in France, approved the panel and its procedures.

### Procedure and questionnaire

Professional investigators contacted the GPs and interviewed them with computer-assisted telephone interview software, using a standardised questionnaire (supplementary file). It collected information about their professional characteristics, their practices regarding tonsillitis, and their individual risk attitudes in their daily life, concerning their personal finances and their medical behaviour regarding patients' health, using a Likert scale from 0 (not at all inclined to take risks) to 10 (totally inclined to take risks).[10, 11] We considered a scoring below 5 to be risk-averse.[10, 11] From the questionnaire we studied the following indicators of compliance with tonsillitis guidelines: awareness and use of national tonsillitis guidelines (indicator 1, reflecting good practice); use of a RADT in the last patient aged between 3-16 years presenting a tonsillitis (indicator 2, good practice); among GPs who declared using a RADT, antibiotic prescription in case of a positive RADT result and absence of antibiotic

1  
2  
3 prescription in case of a negative RADT result (indicator 3, good practice); and among GPs who did  
4 not use a RADT, prescription of an antibiotic (indicator 4, reflecting poor practice).  
5  
6  
7

### 8 9 **Statistical analysis**

10 Due to the panel participants' characteristics, we weighted the data in order to obtain a representative  
11 sample of the national French GP population for age, gender, location and volume of activity. For  
12 indicators 1 and 2, multivariate logistic regressions adjusted on the four stratification variables were  
13 performed, and for indicators 3 and 4 sample selection models in two steps were used to identify the  
14 risk domains associated with indicators of good or poor practice in order to take into account the  
15 selection effect of the sample. In the first step, the dependent variable was the use of RADTs; in the  
16 second step, the dependent variable was either indicator 3 or 4. The stratification variables were  
17 computed in the first step of the model. All indicators were studied separately in each multivariate  
18 analysis. All analyses were performed using SAS 9.3®.  
19  
20  
21  
22  
23  
24  
25  
26  
27  
28  
29  
30  
31  
32  
33  
34  
35  
36  
37  
38  
39  
40  
41  
42  
43  
44  
45  
46  
47  
48  
49  
50  
51  
52  
53  
54  
55  
56  
57  
58  
59  
60

## RESULTS

The socio-demographic characteristics of the participants are presented in Table 1. 69.4% of GPs were aware of national guidelines regarding tonsillitis and declared they had taken these guidelines into account for their last tonsillitis case (indicator 1). 59.1% declared they used a RADT in their last patient aged between 3-16 years presenting with tonsillitis (indicator 2); 29.7% of these tests were positive and antibiotics were prescribed in 30.7% of the cases when a RADT was used. Among the GPs who used a RADT, 98.3% did either prescribe an antibiotic therapy because of a positive RADT result, or did not prescribe an antibiotic therapy in view of a negative result (indicator 3). Among the GPs who did not use a RADT, 50.7% prescribed an antibiotic (indicator 4).

### Individual risk attitudes

The prevalence of risk-averse GPs for the three following domains was as follows: 40.1% for the daily life scale, 56.4% for the personal finances one and 64.5% for the medical behaviour regarding patients' health scale.

### Association between practices and individual risk attitudes (Table 2)

Risk-averse GPs declared being more aware of and compliant with guidelines, and used RADTs more often in their last patient. Among GPs not using a RADT in their last patient, risk-averse GPs prescribed more antibiotics compared to risk-tolerant doctors.

GPs' socio-demographic characteristics also influenced practices : for example, female GPs and GPs <45 years old used RADTs more often in their last patient, but prescribed more antibiotics when a RADT was not used. GPs with a low volume of activity also used RADTs less often.

## DISCUSSION

Our two hypotheses were verified: we found that risk-averse GPs were using RADTs more often and that a risk-averse behaviour was associated with an increase in antibiotic prescriptions when RADTs were not used. It is possible that the diagnostic uncertainty leading to unnecessary antibiotic prescriptions in tonsillitis leaves room for an increased use of RADTs and, as a consequence, for a decreased use of antibiotics in risk-averse GPs using a RADT. RADTs may indeed decrease diagnostic uncertainty, as suggested in the literature.[6-9, 12] RADTs allow the physician to differentiate between viral and bacterial (group A streptococcal infection) tonsillitis, whereas clinical findings do not allow a reliable distinction to be made between viral and bacterial tonsillitis.[3] These tests are thus a very useful strategy to decrease unnecessary antibiotic prescriptions. Since the financial risk domain was associated with indicators 1 and 2, financial incentives regarding RADT use, included in a pay-for-performance programme, might have an impact on practices.

Our study brings out original findings, and is the first, to the best of our knowledge, to have assessed the individual risk attitudes of physicians using a standardised measure scale. It is based on declarative data, and not on real practices, and this could be a limitation; however, standardised questions allowed us to assess the true impact of risk attitudes. Furthermore, clinical vignettes have been shown to be a valid tool for measuring the quality of physician practice.[13] Finally, our results might not be generalisable to other countries, since France is known for its high uncertainty avoidance score, which could be a possible driver behind the observed behaviour.[6-7]

In conclusion, RADTs for tonsillitis can reduce unnecessary antibiotic prescriptions, possibly because they decrease diagnostic uncertainty regarding the aetiology of tonsillitis. Risk-aversion has a dual effect: on the one hand, it induces GPs to use more RADTs (and as a consequence to prescribe less antibiotics), but it also induces GPs to prescribe more antibiotics on the other hand when RADTs are not used.

**Table 1 : Socio-demographic characteristics of the 1093 General Practitioners (GPs).**

| <b>GPs' characteristics</b>                                   |               | <b>%</b> |
|---------------------------------------------------------------|---------------|----------|
| Gender                                                        | Male          | 73.0     |
|                                                               | Female        | 27.0     |
| Age (years)                                                   | < 45          | 21.2     |
|                                                               | 45-54         | 36.3     |
|                                                               | > 54          | 42.5     |
| <b>Medical practice characteristics</b>                       |               |          |
| Location of practice                                          | Urban         | 21.0     |
|                                                               | Peri-urban    | 18.5     |
|                                                               | Rural         | 60.5     |
| Volume of activity (number of annual consultations)           | < 2849        | 20.6     |
|                                                               | 2849 – 5494   | 54.3     |
|                                                               | > 5494        | 25.1     |
| <b>Indicators of good practice</b>                            |               |          |
| Awareness and use of tonsillitis guidelines                   | Yes           | 69.4     |
|                                                               | No            | 30.6     |
| Use of a RADT in the last patient                             | Yes           | 59.1     |
|                                                               | No            | 40.9     |
| Good antibiotic prescription practices among GPs using a RADT | Yes           | 98.3     |
|                                                               | No            | 1.7      |
| <b>Indicator of poor practice</b>                             |               |          |
| Antibiotic prescriptions among GPs not using a RADT           | Yes           | 50.7     |
|                                                               | No            | 49.3     |
| <b>GPs' risk attitudes</b>                                    |               |          |
| Daily life                                                    | Risk-averse   | 40.1     |
|                                                               | Risk-tolerant | 57.2     |



|                                              |                        |      |
|----------------------------------------------|------------------------|------|
|                                              | No answer <sup>a</sup> | 2.7  |
| Medical behaviour regarding patients' health | Risk-averse            | 64.5 |
|                                              | Risk-tolerant          | 32.3 |
|                                              | No answer              | 3.2  |
| Personal finances                            | Risk-averse            | 56.4 |
|                                              | Risk-tolerant          | 40.3 |
|                                              | No answer              | 3.3  |

RADT : Rapid Antigen Diagnostic Test

<sup>a</sup> Corresponds to GPs who chose not to answer the question, and to GPs who answered « I do not know »

Table 2 : Association between declared practices regarding tonsillitis and individual risk attitudes, in multivariate analysis (N= 1093)

| Variables                   | %                                                                      | aOR          | %                                                            | aOR           | %                                                                                                     | aOR           | %                                                                                           | aOR            |
|-----------------------------|------------------------------------------------------------------------|--------------|--------------------------------------------------------------|---------------|-------------------------------------------------------------------------------------------------------|---------------|---------------------------------------------------------------------------------------------|----------------|
|                             | <b>Indicator 1 :</b><br>Awareness and use of<br>tonsillitis guidelines |              | <b>Indicator 2 :</b><br>Use of a RADT in the<br>last patient |               | <b>Indicator 3 :</b><br>Good antibiotic prescription practices<br>among GPs using a RADT <sup>a</sup> |               | <b>Indicator 4 :</b><br>Antibiotic prescriptions among<br>GPs not using a RADT <sup>a</sup> |                |
| <b>GPs' characteristics</b> |                                                                        |              |                                                              |               |                                                                                                       |               |                                                                                             |                |
| Gender                      |                                                                        |              |                                                              |               |                                                                                                       |               |                                                                                             |                |
| Male                        | 66.6                                                                   | 1            | 55.2                                                         | 1             | 98.0                                                                                                  | 1             | 54.3                                                                                        | 1              |
| Female                      | 76.9                                                                   | <b>1.46*</b> | 69.8                                                         | <b>1.58**</b> | 99.0                                                                                                  | <b>1.28**</b> | 36.1                                                                                        | <b>1.32***</b> |
| Age                         |                                                                        |              |                                                              |               |                                                                                                       |               |                                                                                             |                |
| < 45                        | 78.6                                                                   | 1.35         | 75.1                                                         | <b>1.79**</b> | 100                                                                                                   | <b>1.35**</b> | 37.0                                                                                        | <b>1.32**</b>  |
| 45-54                       | 72.1                                                                   | 1            | 60.5                                                         | 1             | 97.6                                                                                                  | 1             | 44.3                                                                                        | 1              |
| > 54                        | 62.4                                                                   | <b>0.69*</b> | 50.0                                                         | <b>0.67**</b> | 97.9                                                                                                  | <b>0.76**</b> | 58.4                                                                                        | <b>0.73***</b> |
| Location of<br>practice     |                                                                        |              |                                                              |               |                                                                                                       |               |                                                                                             |                |
| Urban                       | 65.9                                                                   | 0.91         | 60.3                                                         | 1.28          | 99.6                                                                                                  | 1.16          | 54.9                                                                                        | 1.09           |
| Peri-urban                  | 73.4                                                                   | 1.24         | 66.9                                                         | <b>1.59**</b> | 99.3                                                                                                  | <b>1.29**</b> | 50.7                                                                                        | <b>1.22*</b>   |
| Rural                       | 69.3                                                                   | 1            | 56.4                                                         | 1             | 97.5                                                                                                  | 1             | 49.3                                                                                        | 1              |
| Volume of<br>activity       |                                                                        |              |                                                              |               |                                                                                                       |               |                                                                                             |                |
| < 2849                      | 66.8                                                                   | 0.82         | 54.6                                                         | <b>0.69*</b>  | 98.6                                                                                                  | <b>0.78*</b>  | 49.9                                                                                        | 0.82           |
| 2849-5494                   | 70.7                                                                   | 1            | 63.2                                                         | 1             | 98.4                                                                                                  | 1             | 51.4                                                                                        | 1              |
| > 5494                      | 68.6                                                                   | 0.98         | 54.1                                                         | 0.75          | 98.0                                                                                                  | <b>0.82*</b>  | 50.1                                                                                        | 0.89           |

1  
2  
3  
4  
5  
6  
7  
8  
9  
10  
11  
12  
13  
14  
15  
16  
17  
18  
19  
20  
21  
22  
23  
24  
25  
26  
27  
28  
29  
30  
31  
32  
33  
34  
35  
36  
37  
38  
39  
40  
41  
42  
43  
44  
45  
46  
47  
48  
49

| Domains of risk-aversion |      |               |      |              |      |               |      |              |
|--------------------------|------|---------------|------|--------------|------|---------------|------|--------------|
| Daily life               |      |               |      |              |      |               |      |              |
| Risk-averse              | 69.7 | 0.96          | 60.4 | 0.94         | 97.8 | 0.76          | 54.1 | <b>1.18*</b> |
| Risk-tolerant            | 68.7 | 1             | 58.6 | 1            | 98.7 | 1             | 49.5 | 1            |
| No answer                | 78.9 | 1.50          | 51.9 | 0.67         | 100  | 1.2           | 30.4 | 1.43         |
| Patients' health         | 72.6 | <b>1.56**</b> | 69.9 | 0.99         | 99.4 | <b>1.67**</b> | 48.1 | 0.93         |
| Risk-averse              | 61.5 | 1             | 57.9 | 1            | 96.0 | 1             | 56.8 | 1            |
| Risk-tolerant            | 83.0 | <b>2.90*</b>  | 55.7 | 0.83         | 100  | 1.9           | 38.9 | 0.67         |
| No answer                |      |               |      |              |      |               |      |              |
| Personal finances        | 72.8 | <b>1.45**</b> | 62.7 | <b>1.30*</b> | 98.4 | 0.99          | 50.7 | 1.11         |
| Risk-averse              | 64.2 | 1             | 55.1 | 1            | 98.1 | 1             | 51.4 | 1            |
| Risk-tolerant            | 73.6 | 1.46          | 48.2 | 0.71         | 100  | 0.75          | 42.6 | 0.68         |
| No answer                |      |               |      |              |      |               |      |              |

\* : P<.05 ; \*\* : P<.01 ; \*\*\* : P<.001

RADT : Rapid Antigen Diagnostic Test

<sup>a</sup> Sample selection models in two steps were performed to take into account the selection effect of the sample ; for these models, all three domains of risk were entered in the model 1 by 1. Adjusted Odds Ratios cannot be obtained directly from these models, but they were calculated from the marginal effects.

## ACKNOWLEDGEMENTS

We thank all GPs who participated to the survey as well as members of the supervisory committee of the French Panel of General Practices.

## COMPETING INTERESTS STATEMENT

The authors declare no conflicts of interest.

## FUNDING

The French Panel of General Practices received funding from Direction de la Recherche, des Etudes, de l'Evaluation et des Statistiques (DREES) - Ministère du travail, des relations sociales, de la famille, de la solidarité et de la ville, Ministère de la santé et des sports, through a multiannual agreement on objectives. The work of C.P. was supported by the "Méditerranée Infection" foundation (a non profit-making foundation, <http://www.mediterranee-infection.com/>), which paid for her accommodation and travel expenses when coming to Marseille. A.M.L. received a Ph.D. grant from the same "Méditerranée Infection" foundation. A.N. was supported by "Aix Marseille School of Economics". None of the above bodies had any role in study design; the collection, analysis, and interpretation of data; the writing of the paper; or the decision to submit this paper for publication.

## AUTHORSHIP/CONTRIBUTION

C.P., A.N. and B.V. designed the study. C.P. wrote the article. A.M.L. performed the statistical analysis. A.M.L., A.N., B.V. and P.V. reviewed the study protocol and the article.

## REFERENCES

1. Agence Nationale de Sécurité du Médicament et des Produits de Santé. Dix ans d'évolution des consommations d'antibiotiques en France. 2013.
2. Chahwakilian P, Huttner B, Schlemmer B et al. Impact of the French campaign to reduce inappropriate ambulatory antibiotic use on the prescription and consultation rates for respiratory tract infections. *J Antimicrob Chemother* 2011; **66**: 2872-9.
3. Société de Pathologie Infectieuse de Langue Française. Antibiothérapie par voie générale en pratique courante dans les infections respiratoires hautes de l'adulte et l'enfant. 2011.
4. Pulcini C, Pauvif L, Paraponaris A et al. Perceptions and attitudes of French general practitioners towards rapid antigen diagnostic tests in acute pharyngitis using a randomized case vignette study. *J Antimicrob Chemother* 2012; **67**: 1540-6.
5. Cabana MD, Rand CS, Powe NR et al. Why don't physicians follow clinical practice guidelines? A framework for improvement. *JAMA* 1999; **282**: 1458-65.
6. Borg MA. National cultural dimensions as drivers of inappropriate ambulatory care consumption of antibiotics in Europe and their relevance to awareness campaigns. *J Antimicrob Chemother* 2012; **67**: 763-7.
7. Deschepper R, Grigoryan L, Lundborg CS et al. Are cultural dimensions relevant for explaining cross-national differences in antibiotic use in Europe? *BMC Health Serv Res* 2008; **8**: 123.
8. Teixeira Rodrigues A, Roque F, Falcao A et al. Understanding physician antibiotic prescribing behaviour: a systematic review of qualitative studies. *Int J Antimicrob Agents* 2013; **41**: 203-12.
9. Tonkin-Crine S, Yardley L, Little P. Antibiotic prescribing for acute respiratory tract infections in primary care: a systematic review and meta-ethnography. *J Antimicrob Chemother* 2011; **66**: 2215-23.
10. Arrondel L, Calvo Pardo H. Les Français sont-ils prudents ? Patrimoine et risque sur le marché du travail. *Economie et Statistique* 2008; **417-418**: 27-53.
11. Dohmen T, Falk A, Huffman D, Sunde U. The Intergenerational Transmission of Risk and Trust Attitudes, *Rev Econ Stud* 2012; **79**: 645-677.

1  
2  
3 12. Leydon GM, McDermott L, Moore M et al. A qualitative study of GP, NP and patient views  
4 about the use of rapid streptococcal antigen detection tests (RADTs) in primary care: 'swamped with  
5 sore throats?'. *BMJ Open* 2013; **3**.  
6  
7

8  
9 13. Veloski J, Tai S, Evans AS et al. Clinical vignette-based surveys: a tool for assessing  
10 physician practice variation. *Am J Med Qual* 2005; **20**: 151-7.  
11  
12  
13  
14  
15  
16  
17  
18  
19  
20  
21  
22  
23  
24  
25  
26  
27  
28  
29  
30  
31  
32  
33  
34  
35  
36  
37  
38  
39  
40  
41  
42  
43  
44  
45  
46  
47  
48  
49  
50  
51  
52  
53  
54  
55  
56  
57  
58  
59  
60

For peer review only

## QUESTIONNAIRE

**Antibiotic use - Tonsillitis**

1. In your last patient with tonsillitis, aged 3 to 16 years old, did you use a rapid antigen diagnostic test (RADT) ?

- A. Yes
- B. No => go to question 3
- C. Do not know (answer not cited by the investigator)

If yes,

2. The result of the RADT was :

- A. Positive
- B. Negative
- C. Do not know (answer not cited by the investigator)

3. Did you prescribe an antibiotic ?

- A. Yes
- B. No
- C. Do not know (answer not cited by the investigator)

4. Are you aware of national guidelines regarding the management of upper respiratory tract infections in children ?

- A. Yes
- B. No
- C. Do not know (answer not cited by the investigator)

If yes,

5. Did you take these guidelines into account to manage your last paediatric patient with tonsillitis ?

- A. Yes
- B. No
- C. Do not know (answer not cited by the investigator)

**Risk aversion attitudes**

In this part, we will ask you some questions regarding your attitudes towards situations in a context of uncertainty, and their impact on your practices.

Please take into account the perceptions you have from yourself.

In the following domains, where would you place yourself, from 0 to 10, 0 being « not at all inclined to take risks » and 10 being « totally inclined to take risks » ?

1. First, in the different domains of daily life :

0 / 1 / 2 ..... 9 / 10

2. Then, for the management of your personal finances :

0 / 1 / 2 ..... 9 / 10

3. Finally, regarding your medical behaviour for your patients' health :

0 / 1 / 2 ..... 9 / 10

STROBE 2007 (v4) Statement—Checklist of items that should be included in reports of *cross-sectional studies*

| Section/Topic                | Item # | Recommendation                                                                                                                                                                       | Reported on page # |
|------------------------------|--------|--------------------------------------------------------------------------------------------------------------------------------------------------------------------------------------|--------------------|
| Title and abstract           | 1      | (a) Indicate the study's design with a commonly used term in the title or the abstract                                                                                               | 1                  |
|                              |        | (b) Provide in the abstract an informative and balanced summary of what was done and what was found                                                                                  | 2                  |
| <b>Introduction</b>          |        |                                                                                                                                                                                      |                    |
| Background/rationale         | 2      | Explain the scientific background and rationale for the investigation being reported                                                                                                 | 4                  |
| Objectives                   | 3      | State specific objectives, including any prespecified hypotheses                                                                                                                     | 4                  |
| <b>Methods</b>               |        |                                                                                                                                                                                      |                    |
| Study design                 | 4      | Present key elements of study design early in the paper                                                                                                                              | 5                  |
| Setting                      | 5      | Describe the setting, locations, and relevant dates, including periods of recruitment, exposure, follow-up, and data collection                                                      | 5                  |
| Participants                 | 6      | (a) Give the eligibility criteria, and the sources and methods of selection of participants                                                                                          | 5                  |
| Variables                    | 7      | Clearly define all outcomes, exposures, predictors, potential confounders, and effect modifiers. Give diagnostic criteria, if applicable                                             | 5-6                |
| Data sources/<br>measurement | 8*     | For each variable of interest, give sources of data and details of methods of assessment (measurement). Describe comparability of assessment methods if there is more than one group | 5                  |
| Bias                         | 9      | Describe any efforts to address potential sources of bias                                                                                                                            | 5                  |
| Study size                   | 10     | Explain how the study size was arrived at                                                                                                                                            | NA                 |
| Quantitative variables       | 11     | Explain how quantitative variables were handled in the analyses. If applicable, describe which groupings were chosen and why                                                         | 5                  |
| Statistical methods          | 12     | (a) Describe all statistical methods, including those used to control for confounding                                                                                                | 6                  |
|                              |        | (b) Describe any methods used to examine subgroups and interactions                                                                                                                  | 6                  |
|                              |        | (c) Explain how missing data were addressed                                                                                                                                          | NA                 |
|                              |        | (d) If applicable, describe analytical methods taking account of sampling strategy                                                                                                   | 6                  |
|                              |        | (e) Describe any sensitivity analyses                                                                                                                                                | NA                 |
| <b>Results</b>               |        |                                                                                                                                                                                      |                    |



|                          |     |                                                                                                                                                                                                              |    |
|--------------------------|-----|--------------------------------------------------------------------------------------------------------------------------------------------------------------------------------------------------------------|----|
| Participants             | 13* | (a) Report numbers of individuals at each stage of study—eg numbers potentially eligible, examined for eligibility, confirmed eligible, included in the study, completing follow-up, and analysed            | 7  |
|                          |     | (b) Give reasons for non-participation at each stage                                                                                                                                                         | 5  |
|                          |     | (c) Consider use of a flow diagram                                                                                                                                                                           | NA |
| Descriptive data         | 14* | (a) Give characteristics of study participants (eg demographic, clinical, social) and information on exposures and potential confounders                                                                     | 7  |
|                          |     | (b) Indicate number of participants with missing data for each variable of interest                                                                                                                          | NA |
| Outcome data             | 15* | Report numbers of outcome events or summary measures                                                                                                                                                         | 7  |
| Main results             | 16  | (a) Give unadjusted estimates and, if applicable, confounder-adjusted estimates and their precision (eg, 95% confidence interval). Make clear which confounders were adjusted for and why they were included | 7  |
|                          |     | (b) Report category boundaries when continuous variables were categorized                                                                                                                                    | NA |
|                          |     | (c) If relevant, consider translating estimates of relative risk into absolute risk for a meaningful time period                                                                                             | NA |
| Other analyses           | 17  | Report other analyses done—eg analyses of subgroups and interactions, and sensitivity analyses                                                                                                               | NA |
| <b>Discussion</b>        |     |                                                                                                                                                                                                              |    |
| Key results              | 18  | Summarise key results with reference to study objectives                                                                                                                                                     | 8  |
| Limitations              | 19  | Discuss limitations of the study, taking into account sources of potential bias or imprecision. Discuss both direction and magnitude of any potential bias                                                   | 8  |
| Interpretation           | 20  | Give a cautious overall interpretation of results considering objectives, limitations, multiplicity of analyses, results from similar studies, and other relevant evidence                                   | 8  |
| Generalisability         | 21  | Discuss the generalisability (external validity) of the study results                                                                                                                                        | 8  |
| <b>Other information</b> |     |                                                                                                                                                                                                              |    |
| Funding                  | 22  | Give the source of funding and the role of the funders for the present study and, if applicable, for the original study on which the present article is based                                                | 14 |

\*Give information separately for cases and controls in case-control studies and, if applicable, for exposed and unexposed groups in cohort and cross-sectional studies.

**Note:** An Explanation and Elaboration article discusses each checklist item and gives methodological background and published examples of transparent reporting. The STROBE checklist is best used in conjunction with this article (freely available on the Web sites of PLoS Medicine at <http://www.plosmedicine.org/>, Annals of Internal Medicine at <http://www.annals.org/>, and Epidemiology at <http://www.epidem.com/>). Information on the STROBE Initiative is available at [www.strobe-statement.org](http://www.strobe-statement.org).

## RESEARCH ARTICLE

## Cross-sectional survey : Risk-averse French GPs use more rapid-antigen diagnostic tests in

tonsillitis in children

Audrey Michel-Lepage<sup>1,2</sup>, Bruno Ventelou<sup>1,3,4</sup>, Antoine Nebout<sup>1,7</sup>, Pierre Verger<sup>1,3</sup>, Céline Pulcini<sup>1,5,6</sup>

1. Aix Marseille Université (Aix Marseille School of Economics - SESSTIM UMR 912, Inserm IRD),  
Marseille, France

2. IHU, Fondation Méditerranée Infection, Marseille, France

3. ORS PACA, Observatoire Régional de la Santé Provence-Alpes-Côte d'Azur, Marseille, France

4. CNRS, U6579 (greqam), Marseille, France

5. CHU de Nice, Service d'Infectiologie, Nice, France

6. Université Nice-Sophia Antipolis, Faculté de Médecine, Nice, [France](#)

[7. INRA, UR 1303 ALISS, F-94200 Ivry-sur-Seine, France](#)

Corresponding author: Céline PULCINI. Centre Hospitalier Universitaire de Nice, Service  
d'Infectiologie, Hôpital l'Archet 1, 151 Route Saint Antoine de Ginestière, CS 23079, 06202 Nice  
Cedex 3, France. Tel: + 33 (0)4 92 03 55 15, Fax: + 33 (0)4 93 96 54 54, E-mail: [pulcini.c@chu-  
nice.fr](mailto:pulcini.c@chu-nice.fr)

**Keywords** : antibiotic prescription ; diagnosis ; near-patient testing ; point-of-care test ; risk aversion

Body text: ~~1365~~ 1493 words

~~134~~ references, 2 Tables

Short title: GPs' ~~risk-aversion behaviour~~ risk attitudes and tonsillitis

1  
2  
3  
4  
5  
6  
7  
8  
9  
10  
11  
12  
13  
14  
15  
16  
17  
18  
19  
20  
21  
22  
23  
24  
25  
26  
27  
28  
29  
30  
31  
32  
33  
34  
35  
36  
37  
38  
39  
40  
41  
42  
43  
44  
45  
46  
47  
48  
49  
50  
51  
52  
53  
54  
55  
56  
57  
58  
59  
60**ABSTRACT (28264 words)**

**Objectives** - We tested the following hypotheses: (i) risk-averse general practitioners (GPs) might use more Rapid Antigen Diagnostic Tests (RADTs) in tonsillitis ~~in children, probably-in order~~ to decrease their diagnostic uncertainty ~~regarding the aetiology of the disease (viral versus due to group A Streptococcus)~~; (ii) and GPs not using a RADT might prescribe more antibiotics when they are risk-averse.

**Design, setting and participants** - We conducted in 2012 a cross-sectional survey of a nationwide French representative sample of ~~1093 +136~~ GPs.

**Outcome measures** - Multivariate analyses adjusted on the four stratification variables (age, gender, location and volume of activity, ~~i.e. the number of annual consultations~~) were performed in order to identify the risk ~~aversion~~ domains associated with indicators of good or poor practice.

**Results** - 69.4% of GPs were aware of national guidelines regarding tonsillitis and declared they had taken these guidelines into account for their last ~~paediatric~~ tonsillitis case. 59.15% declared they used a RADT in their last patient aged between 3-16 years presenting with tonsillitis; 29.73% of these tests were positive. Among the GPs who used a RADT, 30.7% prescribed an antibiotic; 98.34% did either prescribe an antibiotic because of a positive RADT result, or did not prescribe an antibiotic in view of a negative result. Among the GPs who did not use a RADT, 50.79% prescribed an antibiotic. In multivariate analyses, risk-averse GPs declared being more aware of and compliant with guidelines (OR=1.569, P<.01), and used RADTs more often ~~in-for~~ their last patient (OR=1.309, P<.054). Among GPs not using a RADT in their last patient, risk-averse GPs prescribed more antibiotics compared to risk-~~seeking-tolerant~~ doctors (OR=1.1824, P<.05).

**Conclusions** - ~~RADTs for tonsillitis are a powerful tool to decrease diagnostic uncertainty and unnecessary antibiotic prescriptions among GPs~~ Individual risk attitudes influenced GPs' practices in tonsillitis, particularly the use of RADTs and antibiotic prescriptions.

## ARTICLE SUMMARY

### Article focus :

- Risk-averse general practitioners (GPs) might use more Rapid Antigen Diagnostic Tests (RADTs) in tonsillitis in children, probably in order to decrease their diagnostic uncertainty regarding the aetiology of the disease (viral versus due to group A Streptococcus).
- GPs not using a RADT might prescribe more antibiotics when they are risk-averse.

### Key messages :

- Risk-averse GPs declared being more aware of and compliant with guidelines.
- Risk-averse GPs used RADTs more often in their last paediatric patient.
- Among GPs not using a RADT in their last patient, risk-averse GPs prescribed more antibiotics compared to risk-seeking-tolerant doctors.

### Strengths and limitations of this study :

- First study to have assessed the impact of risk-aversion behaviour individual risk attitudes of physicians on antibiotic prescribing using a standardised measure scale.
- Based on declarative data, and not on real practices, but standardised questions allowed us to assess the true impact of risk-aversion individual risk attitudes and clinical vignettes have been shown to be a valid tool for measuring the quality of physician practice.

## INTRODUCTION

Given the current worldwide bacterial resistance crisis, decreasing unnecessary antibiotic use is crucial. In France, 80% of all antibiotics used in humans are prescribed in the outpatient setting, and general practitioners (GPs) account for 71% of these prescriptions.[1]

Tonsillitis is one of the leading causes of antibiotic use in the outpatient setting.[2] Rapid Antigen Diagnostic Tests (RADTs) detecting group A streptococcal infections offer a useful mean to reduce unnecessary antibiotic prescriptions: the 2011 French guidelines recommend using these tests in all cases of tonsillitis in children  $\geq 3$  years old and prescribing antibiotics only in proven group A streptococcal infections (positive RADT result).[3] If a RADT is not available, the guidelines explicitly state that no antibiotic therapy is needed.[3] However, in France, RADTs are underused for patients presenting with tonsillitis.[4]

Non-compliance with guidelines can be explained by a variety of factors.[5] ~~Several studies suggest that risk aversion may be a driver for unnecessary antibiotic prescriptions and non-compliance with guidelines regarding antibiotic prescriptions.~~ At country level, « uncertainty avoidance » was recently identified in multivariate analysis as one of the national cultural dimensions significantly associated with (inappropriate) use of antibiotics for colds/flu/sore throats,[6] confirming previous findings.[7]

France is a country with a high uncertainty avoidance score.[6-7] At the individual level, recent reviews of qualitative studies identified diagnostic uncertainty as an important factor favouring antibiotic misuse.[8, 9] Risk aversion slightly differs from uncertainty avoidance, but, as a close concept largely used in economics, it was interesting to know whether it might play a role in antibiotic prescribing and the use of rapid diagnostic tests in tonsillitis. On the one hand, RADTs decrease diagnostic uncertainty, by establishing that the tonsillitis is bacterial (group A streptococcal infection). One may hypothesize that risk-averse GPs might use RADTs more often, possibly as a way to decrease their diagnostic uncertainty. On the other hand, if GPs are not using RADTs, clinical findings do not allow to reliably differentiate between viral and bacterial tonsillitis.[3] Thus, one may hypothesize that risk-averse GPs might prescribe more antibiotics when they are not using RADTs since they may be more sensitive to diagnostic uncertainty than risk-tolerant GPs. Consequently, diagnostic uncertainty might lead here to unnecessary antibiotic prescriptions.

1  
2  
3  
4  
5  
6  
7  
8  
9 In this survey of a nationwide French representative sample of GPs, we wanted to assess the following  
10 hypotheses, taking tonsillitis as an example: (i) risk-averse GPs might use more RADTs, ~~probably in~~  
11 ~~order~~ to decrease their diagnostic uncertainty regarding the aetiology of the disease (viral versus due to  
12 group A *Streptococcus*); (ii) and GPs not using a RADT might prescribe more antibiotics when they  
13  
14  
15 are risk-averse.  
16  
17  
18  
19  
20  
21  
22  
23  
24  
25  
26  
27  
28  
29  
30  
31  
32  
33  
34  
35  
36  
37  
38  
39  
40  
41  
42  
43  
44  
45  
46  
47  
48  
49  
50  
51  
52  
53  
54  
55  
56  
57

## MATERIAL AND METHODS

### Sampling

A panel of French GPs was constituted in June 2010. Its procedures have already been described elsewhere.[4] Briefly, 5170 GPs were selected by random sampling from the Ministry of Health's exhaustive database of health professionals in France. Sampling was stratified for location of the general practice (urban, peri-urban, or rural areas), gender, age (<49, 49–56, >56 years old) and the number of consultations (<2849, 2849–5494, >5494) in 2008. Of the 3888 contacted and eligible GPs, 1431 (36.8%) agreed to participate in the panel, i.e. to provide regular data on their activity and respond to 5 consecutive surveys on different topics during a 30-month period. Among the 1136 GPs who participated in the fifth national cross-sectional survey, conducted in Novembre 2012 (attrition rate between the first and fifth cross-sectional surveys: 20.6%), the results presented in this study are based on 1093 GPs (43 missing values).~~The results presented in this study are based on the 1136 GPs who participated in the fifth national cross-sectional survey, conducted in Novembre 2012 (attrition rate between the first and fifth cross-sectional surveys: 20.6%).~~

### Ethics Statement

The National Data Protection Authority (Commission Nationale Informatique et Libertés), responsible for ethical issues and protection of individual data in France, approved the panel and its procedures.

### Procedure and questionnaire

Professional investigators contacted the GPs and interviewed them with computer-assisted telephone interview software, using a standardised questionnaire (supplementary file). It collected information about their professional characteristics, their practices regarding tonsillitis, and their individual risk aversion~~attitudes~~ ~~for in their~~ daily life ~~in general~~, concerning their personal finances and their medical behaviour regarding patients' health, using a Likert scale from 0 (not at all inclined to take risks) to 10 (totally inclined to take risks).[10, 11] We considered a scoring below 5 to be risk-averse.[10, 11]

From the questionnaire we studied the following indicators of compliance with tonsillitis guidelines: awareness and use of national tonsillitis guidelines (indicator 1, reflecting good practice); use of a

1  
2  
3  
4  
5  
6  
7 RADT in the last patient aged between 3-16 years presenting a tonsillitis (indicator 2, good practice);  
8 among GPs who declared using a RADT, antibiotic prescription in case of a positive RADT result and  
9 absence of antibiotic prescription in case of a negative RADT result (indicator 3, good practice); and  
10 among GPs who did not use a RADT, prescription of an antibiotic (indicator 4, reflecting poor  
11 practice).  
12  
13  
14  
15

### 16 17 **Statistical analysis**

18 Due to the panel participants' characteristics, we weighted the data in order to obtain a representative  
19 sample of the national French GP population for age, gender, location and volume of activity. For  
20 indicators 1 and 2, multivariate logistic regressions adjusted on the four stratification variables were  
21 performed, and for indicators 3 and 4 sample selection models in two steps were used to identify the  
22 risk ~~aversion~~ domains associated with indicators of good or poor practice in order to take into account  
23 the selection effect of the sample. In the first step, the dependent variable was the use of RADTs; in  
24 the second step, the dependent variable was either indicators 3 or 4. The stratification variables were  
25 computed in the first step of the model. All indicators were studied separately in each multivariate  
26 analysis. All analyses were performed using SAS 9.3®.  
27  
28  
29  
30  
31  
32  
33  
34  
35  
36  
37  
38  
39  
40  
41  
42  
43  
44  
45  
46  
47  
48  
49  
50  
51  
52  
53  
54  
55  
56  
57  
58  
59  
60



## RESULTS

The socio-demographic characteristics of the participants are presented in Table 1. 69.4% of GPs were aware of national guidelines regarding tonsillitis and declared they had taken these guidelines into account for their last tonsillitis case (indicator 1). 59.15% declared they used a RADT in their last patient aged between 3-16 years presenting with tonsillitis (indicator 2); 29.73% of these tests were positive and antibiotics were prescribed in 30.7% of the cases when a RADT was used. Among the GPs who used a RADT, 98.34% did either prescribe an antibiotic therapy because of a positive RADT result, or did not prescribe an antibiotic therapy in view of a negative result (indicator 3). Among the GPs who did not use a RADT, 50.79% prescribed an antibiotic (indicator 4).

### ~~Risk aversion behaviour~~ Individual risk attitudes

The prevalence of risk-averse GPs for the three following domains was as follows: 402.1% for the daily life scale, 569.43% for the personal finances one and 647.56% for the medical behaviour regarding patients' health scale.

### **Association between practices and individual risk aversion behaviour attitudes (Table 2)**

Risk-averse GPs declared being more aware of and compliant with guidelines, and used RADTs more often in their last patient. Among GPs not using a RADT in their last patient, risk-averse GPs prescribed more antibiotics compared to risk-~~seeking-tolerant~~ doctors.

GPs' socio-demographic characteristics also influenced practices : for example, female GPs and GPs <45 years old used RADTs more often in their last patient, but prescribed more antibiotics when a RADT was not used. GPs with a low volume of activity also used RADTs less often.

## DISCUSSION

Our two hypotheses were verified: we found that risk-averse GPs were using RADTs more often and that ~~a risk-aversion~~ behaviour was associated with an increase in antibiotic prescriptions when RADTs were not used. ~~Since the literature suggests that risk aversion may be a driver for unnecessary antibiotic prescriptions, the leverage effect of RADTs appears to be all the more powerful since GPs are risk-averse. It seems is possible~~ that the diagnostic uncertainty leading to unnecessary antibiotic prescriptions in tonsillitis leaves room for an increased use of RADTs and, as a consequence, for a decreased use of antibiotics in risk-averse GPs using a RADT. RADTs may indeed decrease diagnostic uncertainty, ~~in accordance with as suggested in the literature previous findings.~~[6-9, 12] RADTs allow the physician to differentiate between viral and bacterial (group A streptococcal infection) tonsillitis, whereas clinical findings do not allow a reliable distinction to be made between viral and bacterial tonsillitis.[3] These tests are thus a very useful strategy to decrease unnecessary antibiotic prescriptions. Since the financial risk ~~aversion~~ domain was ~~frequently involved~~ associated with indicators 1 and 2, financial incentives regarding ~~antibiotic-RADT use, included in a pay-for-performance programme, use~~ might have an impact on practices.

~~Two practical strategies could then decrease GPs' diagnostic uncertainty: the use of RADT and the teaching of communication skills (how to communicate with a patient in case of diagnostic uncertainty). Hrisos et al. indeed demonstrated that a theory-based intervention ("persuasive communication") resulted in lower rates of antibiotic prescribing on patient scenarios compared to a control group for upper respiratory tract infections, partly by reducing the GPs' risk perception.~~[13] RADTs can also support GPs' explanations to the patients that antibiotics are unnecessary.[9, 12] Delayed prescriptions may also help, as GPs can offer patients easy access to an antibiotic at a later time.[8, 9]

Our study brings out original findings, and is the first, to the best of our knowledge, to have assessed the ~~risk-aversion behaviour~~ individual risk attitudes of physicians using a standardised measure scale. It is based on declarative data, and not on real practices, and this could be a limitation; however, standardised questions allowed us to assess the true impact of risk ~~aversion~~ attitudes. Furthermore, clinical vignettes have been shown

1  
2  
3  
4  
5  
6  
7  
8  
9  
10  
11  
12  
13  
14  
15  
16  
17  
18  
19  
20  
21  
22  
23  
24  
25  
26  
27  
28  
29  
30  
31  
32  
33  
34  
35  
36  
37  
38  
39  
40  
41  
42  
43  
44  
45  
46  
47  
48  
49  
50  
51  
52  
53  
54  
55  
56  
57  
58  
59  
60

to be a valid tool for measuring the quality of physician practice.<sup>[413]</sup> ~~Finally, our results might not be generalisable to other countries, since France is known for its high uncertainty avoidance score, which could be a possible driver behind the observed behaviour.[6-7]~~

In conclusion, RADTs for tonsillitis ~~can reduce unnecessary antibiotic prescriptions, possibly because they are a powerful tool to~~ decrease diagnostic uncertainty ~~regarding the aetiology of tonsillitis among GPs, and to reduce unnecessary antibiotic prescriptions.~~ Risk-aversion has ~~then~~ a dual effect: on the one hand, it induces GPs to use more RADTs (and as a consequence to prescribe less antibiotics), but it also induces GPs to prescribe more antibiotics on the other hand when RADTs are not used. ~~These results show the importance of RADT to struggle against “uncertainty avoidance”.~~

Table 1 : Socio-demographic characteristics of the ~~1136-1093~~ General Practitioners (GPs).

| GPs' characteristics                                          |             | %                      |
|---------------------------------------------------------------|-------------|------------------------|
| Gender                                                        | Male        | <del>73.0</del> 73.08  |
|                                                               | Female      | <del>27.0</del> 27.02  |
| Age (years)                                                   | < 45        | <del>21.0</del> 21.029 |
|                                                               | 45-54       | <del>36.5</del> 36.539 |
|                                                               | > 54        | <del>42.3</del> 42.352 |
| <b>Medical practice characteristics</b>                       |             |                        |
| Location of practice                                          | Urban       | 21.0                   |
|                                                               | Peri-urban  | 18.5                   |
|                                                               | Rural       | 60.5                   |
| Volume of activity (number of annual consultations)           | < 2849      | <del>20.6</del> 20.64  |
|                                                               | 2849 – 5494 | 54.3                   |
|                                                               | > 5494      | <del>25.1</del> 25.13  |
| <b>Indicators of good practice</b>                            |             |                        |
| Awareness and use of tonsillitis guidelines                   | Yes         | 69.4                   |
|                                                               | No          | 30.6                   |
| Use of a RADT in the last patient                             | Yes         | <del>59.1</del> 59.15  |
|                                                               | No          | <del>40.9</del> 40.95  |
| Good antibiotic prescription practices among GPs using a RADT | Yes         | 98.34                  |
|                                                               | No          | <del>1.7</del> 1.76    |
| <b>Indicator of poor practice</b>                             |             |                        |
| Antibiotic prescriptions among GPs not using a RADT           | Yes         | <del>50.7</del> 50.79  |
|                                                               | No          | <del>49.3</del> 49.31  |
| <b>GPs' risk <del>attitudes-aversion-behaviour</del></b>      |             |                        |
| Daily life                                                    | Risk-averse | <del>40.2</del> 40.21  |
|                                                               | Risk-       | <del>57.2</del> 57.2   |

1  
2  
3  
4  
5  
6  
7  
8  
9  
10  
11  
12  
13  
14  
15  
16  
17  
18  
19  
20  
21  
22  
23  
24  
25  
26  
27  
28  
29  
30  
31  
32  
33  
34  
35  
36  
37  
38  
39  
40  
41  
42  
43  
44  
45  
46  
47  
48  
49  
50  
51  
52  
53  
54  
55  
56  
57  
58  
59  
60

|                                              |                                                                                                         |
|----------------------------------------------|---------------------------------------------------------------------------------------------------------|
|                                              | <p><u>seekingtolerant</u> 2.79</p> <p><u>No answer</u><sup>a</sup></p>                                  |
| Medical behaviour regarding patients' health | <p>Risk-averse 64.57.6</p> <p>Risk- 32.3</p> <p><u>tolerantseeking</u> 3.24</p> <p><u>No answer</u></p> |
| Personal finances                            | <p>Risk-averse 569.43</p> <p>Risk- 40.3</p> <p><u>tolerantseeking</u> 3.37</p> <p><u>No answer</u></p>  |

Formatted: Superscript

RADT : Rapid Antigen Diagnostic Test

<sup>a</sup>Corresponds to GPs who chose not to answer the question, and to GPs who answered « I do not

know »

Formatted: Superscript

Formatted: Not Superscript/ Subscript

Formatted: Not Superscript/ Subscript

Formatted: Superscript

Table 2 : Association between declared practices regarding tonsillitis and individual risk aversion-behaviourattitudes, in multivariate analysis (N= ~~1136~~1093)

| Variables                   | %                                                               | aOR     | %                                                     | aOR      | %                                                                                              | aOR     | %                                                                                    | aOR     |
|-----------------------------|-----------------------------------------------------------------|---------|-------------------------------------------------------|----------|------------------------------------------------------------------------------------------------|---------|--------------------------------------------------------------------------------------|---------|
|                             | Indicator 1 :<br>Awareness and use of<br>tonsillitis guidelines |         | Indicator 2 :<br>Use of a RADT in the<br>last patient |          | Indicator 3 :<br>Good antibiotic prescription<br>practices among GPs using a RADT <sup>a</sup> |         | Indicator 4 :<br>Antibiotic prescriptions among<br>GPs not using a RADT <sup>a</sup> |         |
| <b>GPs' characteristics</b> |                                                                 |         |                                                       |          |                                                                                                |         |                                                                                      |         |
| Gender                      |                                                                 |         |                                                       |          |                                                                                                |         |                                                                                      |         |
| Male                        | 66.6                                                            | 1       | 55.24                                                 | 1        | 98.04                                                                                          | 1       | 54.37                                                                                | 1       |
| Female                      | 76.9                                                            | 1.467*  | 6970.86                                               | 1.5863** | 99.04                                                                                          | 1.28**  | 365.18                                                                               | 1.32*** |
| Age                         |                                                                 |         |                                                       |          |                                                                                                |         |                                                                                      |         |
| < 45                        | 78.68                                                           | 1.356   | 75.1                                                  | 1.795**  | 100                                                                                            | 1.354** | 376.03                                                                               | 1.321** |
| 45-54                       | 72.10                                                           | 1       | 60.59                                                 | 1        | 97.6                                                                                           | 1       | 44.34                                                                                | 1       |
| > 54                        | 62.4                                                            | 0.6970* | 50.08                                                 | 0.678**  | 97.9                                                                                           | 0.767** | 58.490                                                                               | 0.73*** |
| Location of practice        |                                                                 |         |                                                       |          |                                                                                                |         |                                                                                      |         |
| Urban                       | 65.97                                                           | 0.9188  | 60.37                                                 | 1.285    | 99.6                                                                                           | 1.165   | 54.954                                                                               | 1.098   |
| Peri-urban                  | 73.43                                                           | 1.240   | 66.96                                                 | 1.59*1*  | 99.34                                                                                          | 1.298** | 50.711                                                                               | 1.221*  |
| Rural                       | 69.35                                                           | 1       | 567.40                                                | 1        | 97.56                                                                                          | 1       | 49.35                                                                                | 1       |
| Volume of activity          |                                                                 |         |                                                       |          |                                                                                                |         |                                                                                      |         |
| < 2849                      | 66.84                                                           | 0.8278  | 545.63                                                | 0.69*    | 98.6                                                                                           | 0.787*  | 49.95                                                                                | 0.82    |

1  
2  
3  
4  
5  
6  
7  
8  
9  
10  
11  
12  
13  
14  
15  
16  
17  
18  
19  
20  
21  
22  
23  
24  
25  
26  
27  
28  
29  
30  
31  
32  
33  
34  
35  
36  
37  
38  
39  
40  
41  
42  
43  
44  
45  
46  
47  
48  
49

|                                 |          |          |         |          |       |         |          |          |
|---------------------------------|----------|----------|---------|----------|-------|---------|----------|----------|
| 2849-5494                       | 70.79    | 1        | 63.26   | 1        | 98.4  | 1       | 51.46    | 1        |
| > 5494                          | 68.6     | 0.987    | 54.12   | 0.754*   | 98.0  | 0.820*  | 50.19    | 0.897    |
| <b>Domains of risk-aversion</b> |          |          |         |          |       |         |          |          |
| Daily life                      |          |          |         |          |       |         |          |          |
| Risk-averse                     | 69.70.71 | 0.961.06 | 60.49   | 0.941.10 | 97.8  | 0.764   | 54.15.5  | 1.1821*  |
| Risk-tolerant                   | 68.7     | 1        | 58.9.6  | 1        | 98.7  | 1       | 49.5     | 1        |
| seeking                         | 78.92    | 1.50     | 51.94   | 0.67     | 100.9 | 1.2     | 30.451.8 | 1.43     |
| No answer                       |          |          |         |          |       |         |          |          |
| Patients' health                |          |          |         |          |       |         |          |          |
| Risk-averse                     | 72.6     | 1.560**  | 69.9.7  | 0.991.14 | 99.4  | 1.67*4* | 48.19.6  | 0.931.01 |
| Risk-tolerant                   | 61.5     | 1        | 57.9    | 1        | 96.0  | 1       | 56.8     | 1        |
| seeking                         | 83.04    | 2.90*    | 55.74   | 0.83     | 100.3 | 1.9     | 38.97.5  | 0.67     |
| No answer                       |          |          |         |          |       |         |          |          |
| Personal finances               |          |          |         |          |       |         |          |          |
| Risk-averse                     | 72.3.81  | 1.457**  | 62.3.71 | 1.309**  | 98.4  | 0.997   | 50.71.9  | 1.116    |
| Risk-tolerant                   | 64.2     | 1        | 55.1    | 1        | 98.1  | 1       | 51.4     | 1        |
| seeking                         | 73.69    | 1.46     | 48.27   | 0.71     | 100.5 | 0.75    | 42.62.1  | 0.68     |
| No answer                       |          |          |         |          |       |         |          |          |

Formatted: Font: Not Bold

Formatted: Font: Bold

\* : P<.05 ; \*\* : P<.01 ; \*\*\* : P<.001

RADT : Rapid Antigen Diagnostic Test

1  
2  
3  
4  
5  
6  
7  
8 <sup>a</sup> Sample selection models in two steps were performed to take into account the selection effect of the sample ; for these models, all three domains of risk  
9 ~~aversion~~ were entered in the model 1 by 1. Adjusted Odds Ratios cannot be obtained directly from these models, but they were calculated from the marginal  
10 effects.  
11  
12  
13  
14  
15  
16  
17  
18  
19  
20  
21  
22  
23  
24  
25  
26  
27  
28  
29  
30  
31  
32  
33  
34  
35  
36  
37  
38  
39  
40  
41  
42  
43  
44  
45  
46  
47  
48  
49



## ACKNOWLEDGEMENTS

We thank all GPs who participated to the survey as well as members of the supervisory committee of the French Panel of General Practices.

## COMPETING INTERESTS STATEMENT

The authors declare no conflicts of interest.

## FUNDING

The French Panel of General Practices received funding from Direction de la Recherche, des Etudes, de l'Evaluation et des Statistiques (DREES) - Ministère du travail, des relations sociales, de la famille, de la solidarité et de la ville, Ministère de la santé et des sports, through a multiannual agreement on objectives. The work of C.P. was supported by the "Méditerranée Infection" foundation (a non profit-making foundation, <http://www.mediterranee-infection.com/>), which paid for her accommodation and travel expenses when coming to Marseille. A.M.L. received a Ph.D. grant from the same "Méditerranée Infection" foundation. A.N. was supported by "Aix Marseille School of Economics". None of the above bodies had any role in study design; the collection, analysis, and interpretation of data; the writing of the paper; or the decision to submit this paper for publication.

## AUTHORSHIP/CONTRIBUTION

C.P., A.N. and B.V. designed the study. C.P. wrote the article. A.M.L. performed the statistical analysis. A.M.L., A.N., B.V. and P.V. reviewed the study protocol and the article.

## REFERENCES

1. Agence Nationale de Sécurité du Médicament et des Produits de Santé. Dix ans d'évolution des consommations d'antibiotiques en France. 2013.
2. Chahwakilian P, Huttner B, Schlemmer B et al. Impact of the French campaign to reduce inappropriate ambulatory antibiotic use on the prescription and consultation rates for respiratory tract infections. *J Antimicrob Chemother* 2011; **66**: 2872-9.
3. Société de Pathologie Infectieuse de Langue Française. Antibiothérapie par voie générale en pratique courante dans les infections respiratoires hautes de l'adulte et l'enfant. 2011.
4. Pulcini C, Pauvif L, Paraponaris A et al. Perceptions and attitudes of French general practitioners towards rapid antigen diagnostic tests in acute pharyngitis using a randomized case vignette study. *J Antimicrob Chemother* 2012; **67**: 1540-6.
5. Cabana MD, Rand CS, Powe NR et al. Why don't physicians follow clinical practice guidelines? A framework for improvement. *JAMA* 1999; **282**: 1458-65.
6. Borg MA. National cultural dimensions as drivers of inappropriate ambulatory care consumption of antibiotics in Europe and their relevance to awareness campaigns. *J Antimicrob Chemother* 2012; **67**: 763-7.
7. Deschepper R, Grigoryan L, Lundborg CS et al. Are cultural dimensions relevant for explaining cross-national differences in antibiotic use in Europe? *BMC Health Serv Res* 2008; **8**: 123.
8. Teixeira Rodrigues A, Roque F, Falcao A et al. Understanding physician antibiotic prescribing behaviour: a systematic review of qualitative studies. *Int J Antimicrob Agents* 2013; **41**: 203-12.
9. Tonkin-Crine S, Yardley L, Little P. Antibiotic prescribing for acute respiratory tract infections in primary care: a systematic review and meta-ethnography. *J Antimicrob Chemother* 2011; **66**: 2215-23.
10. Arrondel L, Calvo Pardo H. Les Français sont-ils prudents ? Patrimoine et risque sur le marché du travail. *Economie et Statistique* 2008; **417-418**: 27-53.
11. Dohmen T, Falk A, Huffman D, Sunde U. The Intergenerational Transmission of Risk and Trust Attitudes. *Rev Econ Stud* 2012; **79**: 645-677.

1  
2  
3  
4  
5  
6  
7  
8  
9  
10  
11  
12  
13  
14  
15  
16  
17  
18  
19  
20  
21  
22  
23  
24  
25  
26  
27  
28  
29  
30  
31  
32  
33  
34  
35  
36  
37  
38  
39  
40  
41  
42  
43  
44  
45  
46  
47  
48  
49  
50  
51  
52  
53  
54  
55  
56  
57  
58  
59  
60

12. Leydon GM, McDermott L, Moore M et al. A qualitative study of GP, NP and patient views about the use of rapid streptococcal antigen detection tests (RADTs) in primary care: 'swamped with sore throats?'. *BMJ Open* 2013; **3**.

~~13. Hrisos S, Eceles M, Johnston M et al. An intervention modelling experiment to change GPs' intentions to implement evidence based practice: using theory based interventions to promote GP management of upper respiratory tract infection without prescribing antibiotics. *BMC Health Serv Res* 2008; **8**: 10.~~

134. Veloski J, Tai S, Evans AS et al. Clinical vignette-based surveys: a tool for assessing physician practice variation. *Am J Med Qual* 2005; **20**: 151-7.
